# Supplementary material for: Average and local structures of κ-phase CeZrO4 crystals by neutron powder diffraction
Source: Royal Society of Chemistry journal article supplement (doi:10.1039/c9ce01226e), 2019-01-01
Supplement: c9ce01226e1.pdf [file c9ce01226e1.pdf]

## Supporting Information

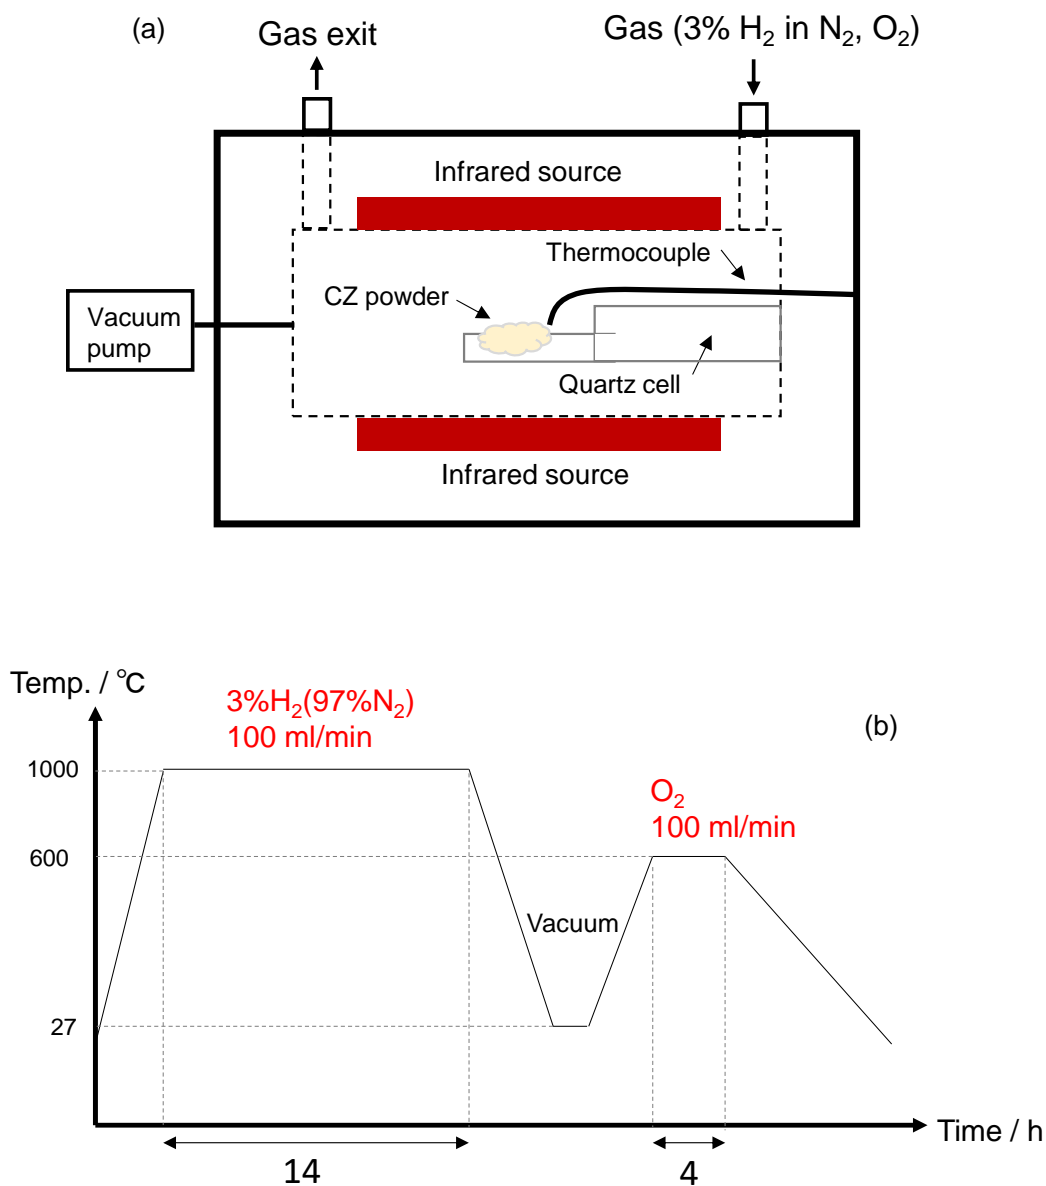

Figure S1. (a) Set-up view of the high-temperature gas furnace, (b) Schematic description of temperature program for redox treatment.

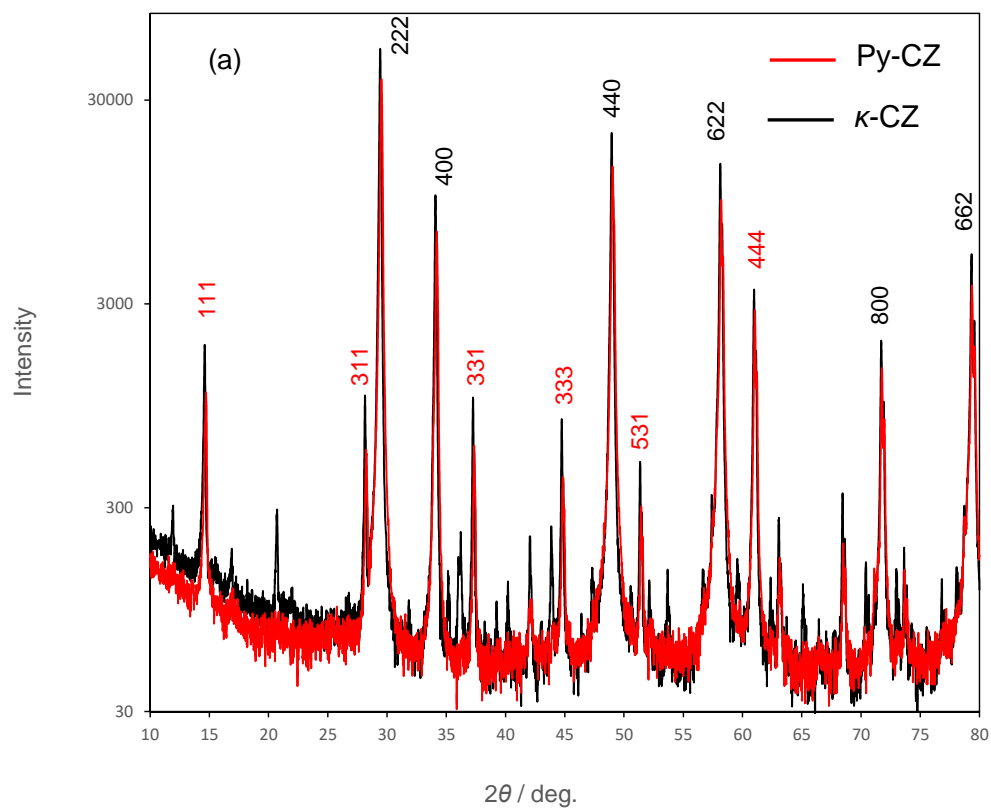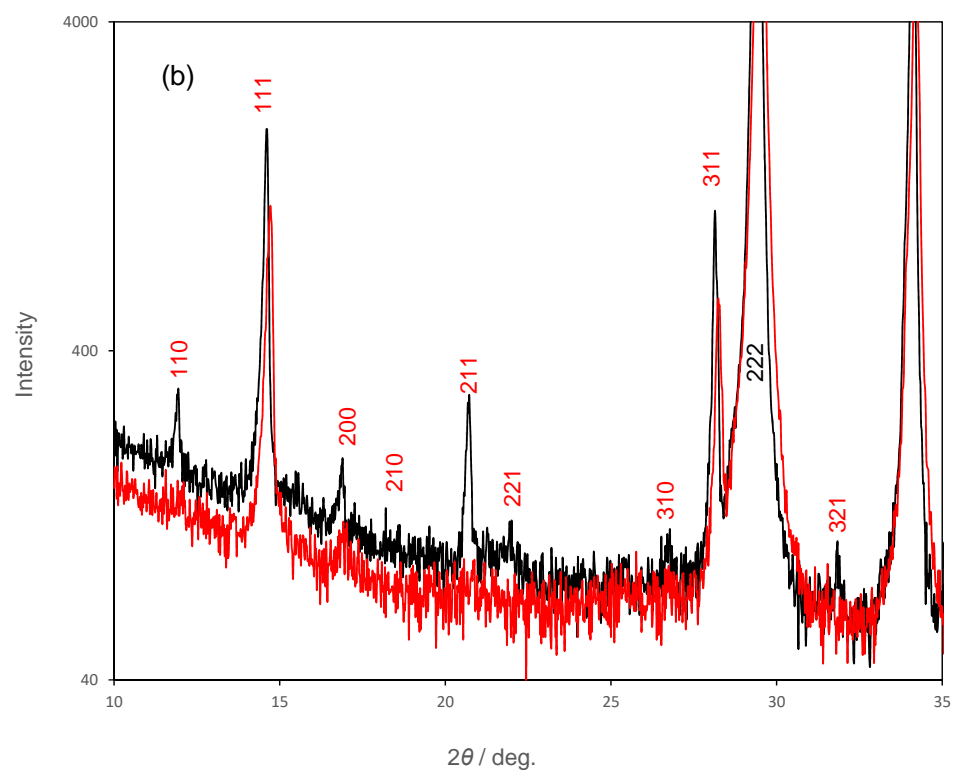

Figure S2. XRD patterns of  $\kappa$ -CZ and pyrochlore-type CZ as a reference: (a)  $10 \leq 2\theta \leq 80^\circ$  (linear scale), (b)  $10 \leq 2\theta \leq 35^\circ$  (log scale).

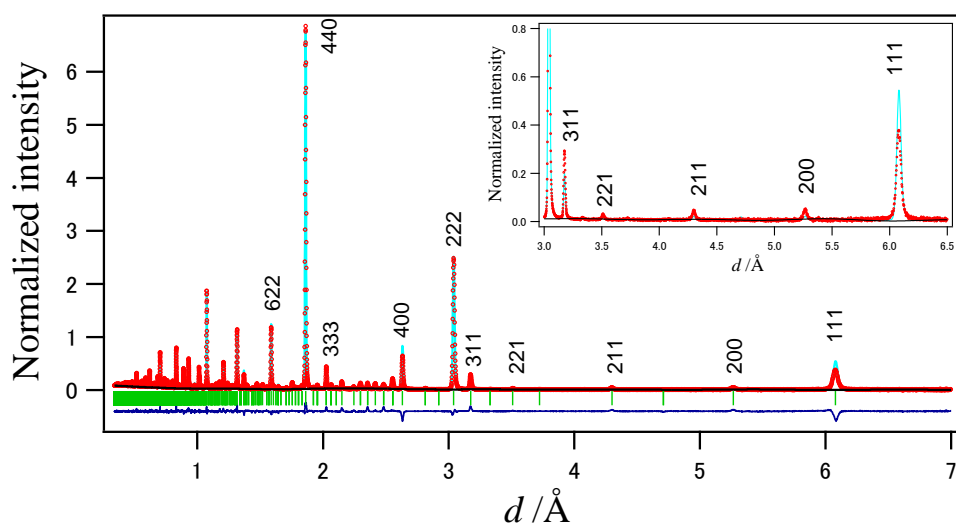

Figure S3. Rietveld refinement patterns of  $\kappa$ -CZ, which was refined by cubic structure (space group  $P2_13$ ). The red “o” marks, solid light-blue line, green tick marks, and lower solid blue line indicate experimental data, calculated data, Bragg-peak positions of cubic  $\kappa$ -CZ, and the difference between experimental and calculated intensities, respectively. The final  $R$  factor and chi-square were  $R_{wp} = 11.9\%$  and  $S^2 = 42.4$ , respectively.

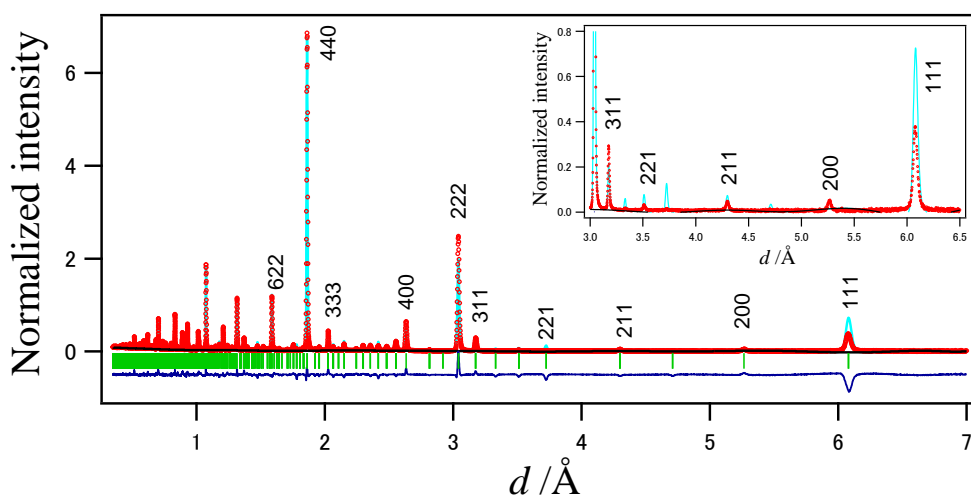

Figure S4. Rietveld refinement patterns of  $\kappa$ -CZ, which was refined by trigonal structure (space group  $R-3m$ ). The red “o” marks, solid light-blue line, green tick marks, and lower solid blue line indicate experimental data, calculated data, Bragg-peak positions of cubic  $\kappa$ -CZ, and the difference between experimental and calculated intensities, respectively. Lattice parameters were  $a=10.534199(8)$  Å,  $\alpha=90.05^\circ$ . The final  $R$  factor and chi-square were  $R_{wp} = 16.2\%$  and  $S^2 = 78.6$ , respectively. Inset: The diffracted patterns for the  $d$ -spacing between 3.0 and 6.5 Å.

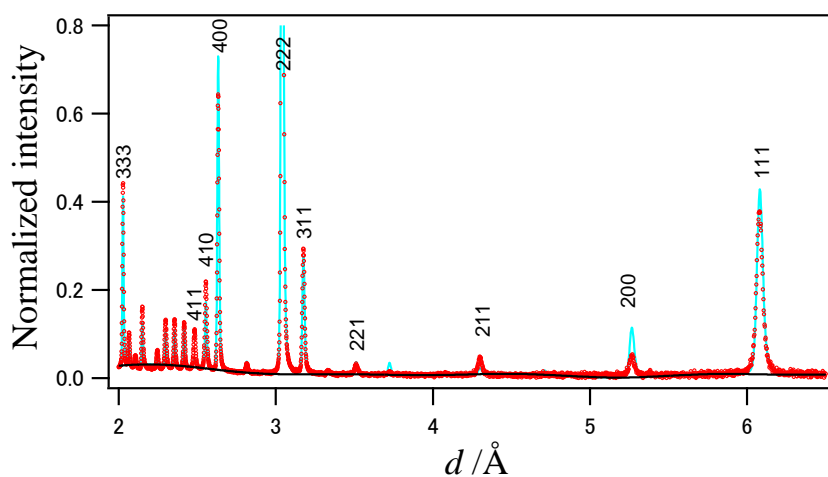

Figure S5. Rietveld refinement patterns of oxygen-deficient cubic  $\kappa$ -CZ ( $\text{CeZrO}_{3.773(1)}$ ). The diffracted patterns for the  $d$ -spacing between 2.0 and 6.5 Å.

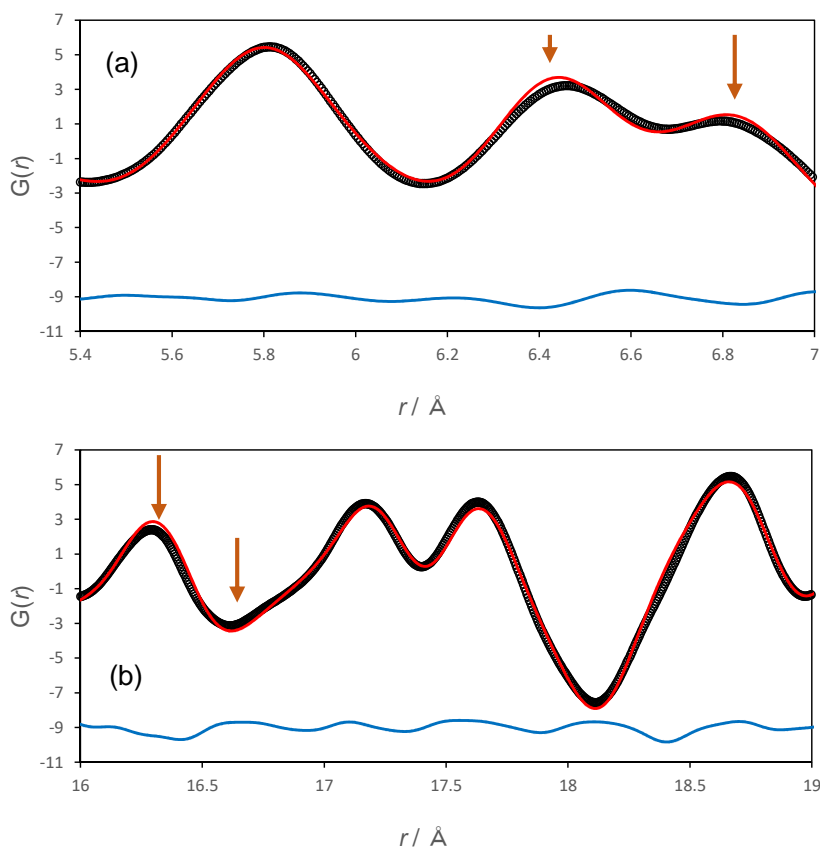

Figure S6. Neutron PDF spectra of oxygen-deficient cubic  $\kappa$ -CZ ( $\text{CeZrO}_{3.773(1)}$ ) in the  $r$  range (b)  $5.4 < r < 7.0$  Å and  $16 < r < 19$  Å. The black “o” marks, solid red line, and lower solid blue line indicate experimental  $G(r)$  data, calculated data, and the difference between experimental and calculated intensities, respectively. Arrows indicate that the differences (miss fits) were observed by the cubic phase.

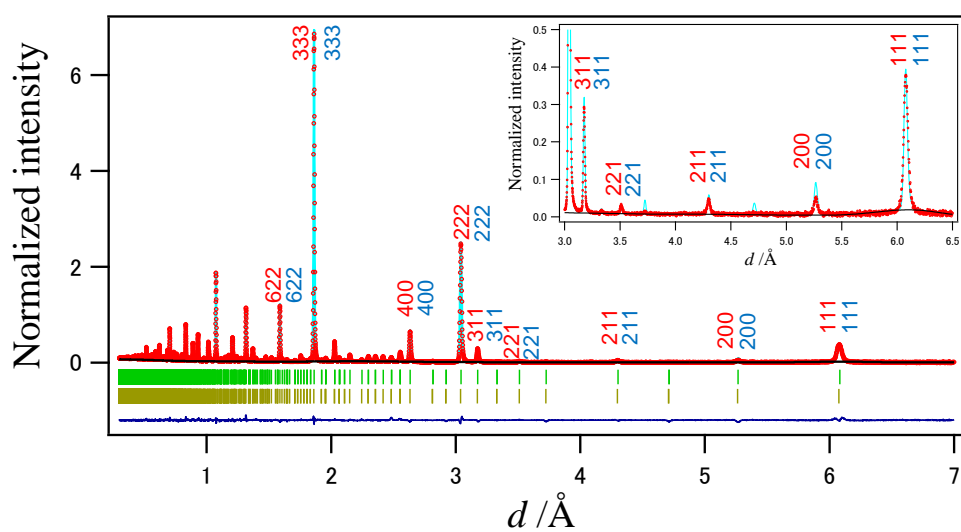

Figure S7. Rietveld refinement patterns of  $\kappa$ -CZ, which was refined by double-phases of cubic structure (space group  $P2_13$ ). The red “o” marks, solid light-blue line, green tick marks, and lower solid blue line indicate experimental data, calculated data, Bragg-peak positions of cubic  $\kappa$ -CZ, and the difference between experimental and calculated intensities, respectively. The final results gave the following crystallographic parameters: (1)  $\text{CeZrO}_{3.82(2)}$  belonging to space group  $P2_13$  with  $a=10.53803(4)$   $\text{\AA}$  and (2)  $\text{CeZrO}_{3.96(3)}$  belonging to space group  $P2_13$  with  $a=10.52825(2)$   $\text{\AA}$ . The final  $R$  factor and chi-square were  $R_{\text{wp}} = 8.17\%$  and  $S^2 = 20.0$ , respectively. Inset: The diffracted patterns for the  $d$ -spacing between 3.0 and 6.5  $\text{\AA}$ .

Table S1. Crystal structure parameters of  $\kappa$ -CZ: (a)  $P2_13$ , (b)  $R-3m$

| Sample                    | $\kappa$ -CZ             |                    |
|---------------------------|--------------------------|--------------------|
| Chemical formula          | CeZrO <sub>3.82(2)</sub> | CeZrO <sub>4</sub> |
| Crystal system            | Cubic                    | Trigonal           |
| Space group               | $P2_13$ (#198)           | $R-3m$ (#166_2)    |
| $a$ (Å)                   | 10.534324(7)             | 10.53270(8)        |
| $\alpha=\beta=\gamma$ (°) | 90                       | 90.012(2)          |
| $V$ (Å <sup>3</sup> )     | 1169                     | 1168.5             |
| $Z$                       | 16                       | 16                 |

| (a) | site | $g$      | $x$        | $y$        | $z$        | $B_{\text{iso}}$ (Å <sup>2</sup> ) |
|-----|------|----------|------------|------------|------------|------------------------------------|
| Ce1 | 4a   | 1        | 0.3814(1)  | 0.3814(1)  | 0.3814(1)  | 0.115(8)                           |
| Ce2 | 12b  | 1        | 0.1262(1)  | 0.1209(1)  | 0.3716(1)  | 0.115(8)                           |
| Zr1 | 4a   | 1        | 0.8676(1)  | 0.8676(1)  | 0.8676(1)  | 0.492(8)                           |
| Zr2 | 12b  | 1        | 0.1283(1)  | 0.1293(1)  | 0.8689(1)  | 0.492(8)                           |
| O1  | 4a   | 1        | 0.2523(1)  | 0.2523(1)  | 0.2523(1)  | 0.573(3)                           |
| O2  | 4a   | 0.865(2) | 0.4944(1)  | 0.4944(1)  | 0.4944(1)  | 0.573(3)                           |
| O3  | 4a   | 1        | 0.7467(2)  | 0.7467(2)  | 0.7467(2)  | 0.573(3)                           |
| O4  | 4a   | 0.417(2) | 0.0133(2)  | 0.0133(2)  | 0.0133(2)  | 0.573(3)                           |
| O5  | 12b  | 1        | 0.0049(1)  | -0.0027(1) | 0.79536(5) | 0.573(3)                           |
| O6  | 12b  | 1        | -0.0023(1) | 0.0018(1)  | 0.23930(8) | 0.573(3)                           |
| O7  | 12b  | 1        | 0.2523(2)  | 0.2506(2)  | 0.5074(1)  | 0.573(3)                           |
| O8  | 12b  | 1        | 0.2540(2)  | 0.2514(1)  | 0.0018(1)  | 0.573(3)                           |

| (b) | site        | <i>g</i> | <i>x</i>  | <i>y</i>  | <i>z</i>   | $B_{\text{iso}} (\text{\AA}^2)$ |
|-----|-------------|----------|-----------|-----------|------------|---------------------------------|
| Ce1 | 1 <i>a</i>  | 1        | 0         | 0         | 0          | 1.44(8)                         |
| Ce2 | 3 <i>e</i>  | 1        | 0         | 1/2       | 1/2        | 1.44(8)                         |
| Ce3 | 6 <i>h</i>  | 1        | 0.2013(8) | 0.2013(8) | -0.0133(9) | 1.44(8)                         |
| Ce4 | 6 <i>g</i>  | 1        | 0.2667(8) | 0.7332(8) | 1/2        | 1.44(8)                         |
| Zr1 | 1 <i>b</i>  | 1        | 1/2       | 1/2       | 1/2        | 0.38(5)                         |
| Zr2 | 3 <i>d</i>  | 1        | 1/2       | 0         | 0          | 0.38(5)                         |
| Zr3 | 6 <i>f</i>  | 1        | 0.2601(4) | 0.7398(4) | 0          | 0.38(5)                         |
| Zr4 | 6 <i>h</i>  | 1        | 0.2282(3) | 0.2282(3) | 0.5744(8)  | 0.38(5)                         |
| O1  | 2 <i>c</i>  | 1        | 0.1444(9) | 0.1444(9) | 0.1444(9)  | 0.49(3)                         |
| O2  | 6 <i>h</i>  | 1        | 0.3511(9) | 0.3511(9) | 0.147(1)   | 0.49(3)                         |
| O3  | 2 <i>c</i>  | 1        | 0.4118(7) | 0.4118(7) | 0.4118(7)  | 0.49(3)                         |
| O4  | 6 <i>h</i>  | 1        | 0.9249(8) | 0.9249(8) | 0.4610(8)  | 0.49(3)                         |
| O5  | 6 <i>h</i>  | 1        | 0.3085(7) | 0.1049(4) | 0.1049(4)  | 0.49(3)                         |
| O6  | 12 <i>i</i> | 1        | 0.4300(8) | 0.1126(8) | 0.6424(8)  | 0.49(3)                         |
| O7  | 12 <i>i</i> | 1        | 0.1544(8) | 0.8548(8) | 0.3568(8)  | 0.49(3)                         |
| O8  | 6 <i>h</i>  | 1        | 0.166(1)  | 0.361(1)  | 0.361(1)   | 0.49(3)                         |
| O9  | 6 <i>h</i>  | 1        | 0.3129(8) | 0.6256(8) | 0.6256(8)  | 0.49(3)                         |
| O10 | 6 <i>h</i>  | 1        | 0.7900(7) | 0.0550(8) | 0.0550(8)  | 0.49(3)                         |
